# Supplementary material for: Nanoparticle-Mediated Radiotherapy: Unraveling Dose Enhancement and Apoptotic Responses in Cancer and Normal Cell Lines
Source: MDPI journal article supplement (doi:10.3390/biom13121720), 2023-11-29
Supplement: s1 [file s1]

*Supplementary Information*

**"Nanoparticle-Mediated Radiotherapy: Unraveling Dose Enhancement and Apoptotic Responses in Cancer and Normal Cell Lines "**

Maria Anthi Kouri, Ellas Spyratou, Maria-Eleni Kalkou, Georgios Patatoukas, Evangelia Angelopoulou, Ioanna Tremi, Sophia Havaki, Vassilis G. Gorgoulis , Vassilis Kouloulis, Kalliopi Platoni, and Efstathios P. Eftstathopoulos\* .

**Table S1**  $\alpha$  (alpha),  $\beta$  (beta) and  $\alpha/\beta$  parameters for 0 hours Post-Irradiation.

| (Gy <sup>-1</sup> ) | SiHa  |             | Caski |             | HCK1T |             |
|---------------------|-------|-------------|-------|-------------|-------|-------------|
|                     | Cells | Cells+AuNPs | Cells | Cells+AuNPs | Cells | Cells+AuNPs |
| $\alpha$            | 0.59  | 0.82        | 0.59  | 0.58        | 0.63  | 0.64        |
| $\beta$             | 0.09  | 0.16        | 0.09  | 0.10        | 0.10  | 0.10        |
| $\alpha/\beta$      | 6.64  | 5.00        | 5.64  | 5.64        | 6.41  | 6.30        |

**Table S2**  $\alpha$  (alpha),  $\beta$  (beta) and  $\alpha/\beta$  parameters for 24 hours Post-Irradiation.

| (Gy <sup>-1</sup> ) | SiHa  |             | Casky |             | HCK1T |             |
|---------------------|-------|-------------|-------|-------------|-------|-------------|
|                     | Cells | Cells+AuNPs | Cells | Cells+AuNPs | Cells | Cells+AuNPs |
| $\alpha$            | 0.81  | 0.98        | 0.59  | 0.66        | 0.56  | 0.56        |
| $\beta$             | 0.15  | 0.19        | 0.10  | 0.11        | 0.09  | 0.09        |
| $\alpha/\beta$      | 5.59  | 5.29        | 6.06  | 5.64        | 6.05  | 6.05        |

**Table S3**  $\alpha$  (alpha),  $\beta$  (beta) and  $\alpha/\beta$  parameters for 48 hours Post-Irradiation.

| (Gy <sup>-1</sup> ) | SiHa  |             | Casky |             | HCK1T |             |
|---------------------|-------|-------------|-------|-------------|-------|-------------|
|                     | Cells | Cells+AuNPs | Cells | Cells+AuNPs | Cells | Cells+AuNPs |
| $\alpha$            | 0.53  | 0.64        | 0.64  | 0.74        | 0.53  | 0.53        |
| $\beta$             | 0.09  | 0.09        | 0.10  | 0.11        | 0.09  | 0.09        |
| $\alpha/\beta$      | 6.14  | 6.98        | 6.53  | 6.86        | 5.84  | 5.84        |

**Table S4**  $\alpha$  (alpha),  $\beta$  (beta) and  $\alpha/\beta$  parameters for 72 hours Post-Irradiation.

| (Gy <sup>-1</sup> ) | SiHa  |             | Casky |             | HCK1T |             |
|---------------------|-------|-------------|-------|-------------|-------|-------------|
|                     | Cells | Cells+AuNPs | Cells | Cells+AuNPs | Cells | Cells+AuNPs |
| $\alpha$            | 0.71  | 0.72        | 0.56  | 0.59        | 0.54  | 0.54        |
| $\beta$             | 0.12  | 0.12        | 0.10  | 0.10        | 0.10  | 0.10        |
| $\alpha/\beta$      | 5.70  | 5.93        | 5.67  | 5.68        | 5.58  | 5.58        |
